# Supplementary material for: ABBV-085, Antibody–Drug Conjugate Targeting LRRC15, Is Effective in Osteosarcoma: A Report by the Pediatric Preclinical Testing Consortium
Source: Oxford University Press journal article supplement (doi:10.1158/1535-7163.mct-20-0406), 2020-12-09
Supplement: 15357163mct200406-sup-243276_2_supp_6659896_q7gt5r.xlsx [file 15357163mct200406-sup-243276_2_supp_6659896_q7gt5r.xlsx]

## Sheet: Sheet1
PDX model	Passage #	Time from implantation to testing (weeks)
OS 1	17	4
OS 9	21	4
OS 33	9	3
OS 34	6	4
OS 42	12	4
OS 55	10	6
OS 60	9	4
