# Supplementary material for: ABBV-085, Antibody–Drug Conjugate Targeting LRRC15, Is Effective in Osteosarcoma: A Report by the Pediatric Preclinical Testing Consortium
Source: Oxford University Press journal article supplement (doi:10.1158/1535-7163.mct-20-0406), 2020-12-09
Supplement: 15357163mct200406-sup-243276_2_supp_6659897_q9gt5r.docx [file 15357163mct200406-sup-243276_2_supp_6659897_q9gt5r.docx]

Supplemental Table 2

**LRRC15 Gene Expression across osteosarcoma PDX models**

| Line | Panel | Affymetrix value | Agilent Values |
| --- | --- | --- | --- |
| OS-1-XE | Osteosarcoma | 2452 | NA |
| OS-2-XE | Osteosarcoma | 774 | 1146 |
| OS-9-XE | Osteosarcoma | 253 | 232 |
| OS-17-XE | Osteosarcoma | 870 | NA |
| OS-29-XE | Osteosarcoma | 52 | 550 |
| OS-31-XE | Osteosarcoma | 628 | 667 |
| OS-33-XE | Osteosarcoma | 3562 | 12582 |
